# Supplementary material for: Structural, spectroscopic and theoretical studies on dixanthogens: (ROC(S)S)2, with R = n-propyl and isopropyl
Source: Royal Society of Chemistry journal article supplement (doi:10.1039/c4nj00708e), 2014-01-01
Supplement: c4nj00708e1.pdf [file c4nj00708e1.pdf]

*New Journal of Chemistry*

## Supplementary Material

# **Structural, spectroscopic and theoretical studies on dixanthogens: (ROC(S)S)<sub>2</sub>, with R = n-propyl and isopropyl**

*Luciana C. Juncal, Yeny A. Tobón, Oscar E. Piro, Carlos O. Della Védova and  
Rosana M. Romano\**

**Table S1.** Crystal data and structure refinement results for [(CH<sub>3</sub>)<sub>2</sub>CHOC(S)S]<sub>2</sub>.

|                                        |                                                                                                   |
|----------------------------------------|---------------------------------------------------------------------------------------------------|
| Empirical formula                      | C <sub>8</sub> H <sub>14</sub> O <sub>2</sub> S <sub>4</sub>                                      |
| Formula weight                         | 270.43                                                                                            |
| Temperature                            | 296(2) K                                                                                          |
| Wavelength                             | 1.54184 Å                                                                                         |
| Crystal system                         | Monoclinic                                                                                        |
| Space group                            | <i>P</i> 2 <sub>1</sub> / <i>c</i>                                                                |
| Unit cell dimensions                   | <i>a</i> = 9.735(1) Å<br><i>b</i> = 12.588(3) Å<br><i>c</i> = 12.131(2) Å<br>$\beta$ = 112.65(1)° |
| Volume                                 | 1371.9(4) Å <sup>3</sup>                                                                          |
| Z, calculated density                  | 4, 1.309 Mg/m <sup>3</sup>                                                                        |
| Absorption coefficient                 | 6.186 mm <sup>-1</sup>                                                                            |
| F(000)                                 | 568                                                                                               |
| Crystal size                           | 0.36 x 0.24 x 0.20 mm <sup>3</sup>                                                                |
| $\vartheta$ -range for data collection | 4.92 to 68.00°                                                                                    |
| Index ranges                           | 11 ≤ <i>h</i> ≤ 0, -1 ≤ <i>k</i> ≤ 15, -13 ≤ <i>l</i> ≤ 14                                        |
| Reflections collected                  | 2798                                                                                              |
| Independent reflections                | 2408 [R(int) = 0.0572]                                                                            |
| Observed reflections [I > 2σ(I)]       | 1984                                                                                              |
| Completeness to $\vartheta$ = 68.00°   | 96.4%                                                                                             |
| Max. and min. transmission             | 0.4126 and 0.1587                                                                                 |
| Refinement method                      | Full-matrix least-squares on F <sup>2</sup>                                                       |
| Data / restraints / parameters         | 2408 / 0 / 131                                                                                    |
| Goodness-of-fit on F <sup>2</sup>      | 1.065                                                                                             |
| Final R indices [I > 2σ(I)]            | R1 = 0.0720, wR2 = 0.1911                                                                         |
| R indices (all data)                   | R1 = 0.0806, wR2 = 0.2066                                                                         |
| Largest diff. peak and hole            | 0.769 and -0.474 e.Å <sup>-3</sup>                                                                |

---

$$^a R_1 = \frac{\sum ||F_o| - |F_c||}{\sum |F_o|}, \quad wR_2 = \left[ \frac{\sum w(|F_o|^2 - |F_c|^2)^2}{\sum w(|F_o|^2)^2} \right]^{1/2}$$

**Table S2** Atomic coordinates ( $\times 10^4$ ) and equivalent isotropic displacement parameters ( $\text{\AA}^2 \times 10^3$ ) for  $[(\text{CH}_3)_2\text{CHOC}(\text{S})\text{S}]_2$ .  $U(\text{eq})$  is defined as one third of the trace of the orthogonalized  $U_{ij}$  tensor.

| Atom | x       | y       | z        | $U(\text{eq})$ |
|------|---------|---------|----------|----------------|
| S(1) | 8205(1) | 885(1)  | -78(1)   | 81(1)          |
| S(2) | 6946(1) | -450(1) | -686(1)  | 78(1)          |
| S(3) | 9701(2) | 2389(1) | -1001(1) | 117(1)         |
| S(4) | 3849(1) | -941(1) | -1949(1) | 91(1)          |
| O(1) | 8069(4) | 795(2)  | -2244(2) | 86(1)          |
| O(2) | 4956(3) | 1016(2) | -1523(2) | 68(1)          |
| C(1) | 8657(4) | 1342(3) | -1266(3) | 73(1)          |
| C(2) | 5099(4) | -4(3)   | -1444(3) | 69(1)          |
| C(3) | 8360(6) | 1075(4) | -3326(4) | 91(1)          |
| C(4) | 3463(4) | 1482(3) | -2153(3) | 72(1)          |
| C(5) | 6890(7) | 1147(6) | -4317(5) | 139(3)         |
| C(6) | 3180(6) | 1528(4) | -3462(4) | 98(1)          |
| C(7) | 9323(7) | 217(7)  | -3491(6) | 139(2)         |
| C(8) | 3505(6) | 2544(3) | -1607(4) | 91(1)          |

**Table S3.** Full bond lengths [ $\text{\AA}$ ] and angles [ $^\circ$ ] for  $[(\text{CH}_3)_2\text{CHOC}(\text{S})\text{S}]_2$

|                |          |                |          |
|----------------|----------|----------------|----------|
| S(1)-C(1)      | 1.758(4) | C(2)-S(2)-S(1) | 106.0(1) |
| S(1)-S(2)      | 2.042(2) | C(1)-O(1)-C(3) | 120.9(3) |
| S(2)-C(2)      | 1.767(4) | C(2)-O(2)-C(4) | 119.3(3) |
| S(3)-C(1)      | 1.619(4) | O(1)-C(1)-S(3) | 129.4(3) |
| S(4)-C(2)      | 1.635(4) | O(1)-C(1)-S(1) | 114.5(3) |
| O(1)-C(1)      | 1.298(4) | S(3)-C(1)-S(1) | 116.1(2) |
| O(1)-C(3)      | 1.488(5) | O(2)-C(2)-S(4) | 130.3(3) |
| O(2)-C(2)      | 1.291(4) | O(2)-C(2)-S(2) | 114.4(3) |
| O(2)-C(4)      | 1.478(4) | S(4)-C(2)-S(2) | 115.3(2) |
| C(3)-C(5)      | 1.475(8) | C(5)-C(3)-O(1) | 106.3(4) |
| C(3)-C(7)      | 1.493(8) | C(5)-C(3)-C(7) | 113.4(5) |
| C(4)-C(6)      | 1.504(5) | O(1)-C(3)-C(7) | 106.9(4) |
| C(4)-C(8)      | 1.487(6) | O(2)-C(4)-C(6) | 107.8(3) |
|                |          | O(2)-C(4)-C(8) | 105.9(3) |
| C(1)-S(1)-S(2) | 106.1(1) | C(6)-C(4)-C(8) | 113.5(4) |

**Table S4.** Anisotropic displacement parameters ( $\text{\AA}^2 \times 10^3$ ) for  $[(\text{CH}_3)_2\text{CHOC}(\text{S})\text{S}]_2$ . The anisotropic displacement factor exponent takes the form:  $-2\pi^2[h^2a^{*2}U^{11} + \dots + 2hk a^*b^*U^{12}]$ .

| Atom | $U^{11}$ | $U^{22}$ | $U^{33}$ | $U^{23}$ | $U^{13}$ | $U^{12}$ |
|------|----------|----------|----------|----------|----------|----------|
| S(1) | 76(1)    | 104(1)   | 55(1)    | -6(1)    | 17(1)    | 4(1)     |
| S(2) | 91(1)    | 78(1)    | 70(1)    | 12(1)    | 36(1)    | 13(1)    |
| S(3) | 111(1)   | 125(1)   | 110(1)   | -34(1)   | 37(1)    | -50(1)   |
| S(4) | 102(1)   | 76(1)    | 106(1)   | -10(1)   | 54(1)    | -16(1)   |
| O(1) | 109(2)   | 88(2)    | 65(2)    | -14(1)   | 39(2)    | -28(2)   |
| O(2) | 72(1)    | 69(1)    | 60(1)    | 6(1)     | 20(1)    | -2(1)    |
| C(1) | 61(2)    | 85(2)    | 66(2)    | -6(2)    | 17(2)    | 2(2)     |
| C(2) | 80(2)    | 77(2)    | 58(2)    | 2(2)     | 36(2)    | 0(2)     |
| C(3) | 120(4)   | 92(3)    | 71(2)    | -6(2)    | 47(2)    | -27(3)   |
| C(4) | 67(2)    | 77(2)    | 69(2)    | 9(2)     | 24(2)    | 0(2)     |
| C(5) | 143(5)   | 199(7)   | 79(3)    | 25(4)    | 47(3)    | 61(5)    |
| C(6) | 109(3)   | 105(3)   | 63(2)    | 7(2)     | 15(2)    | 7(3)     |
| C(7) | 104(4)   | 210(7)   | 124(5)   | 22(5)    | 68(4)    | 32(5)    |
| C(8) | 102(3)   | 83(3)    | 97(3)    | 3(2)     | 48(3)    | 7(2)     |

**Table S5.** Hydrogen coordinates ( $\times 10^4$ ) and isotropic displacement parameters ( $\text{\AA}^2 \times 10^3$ ) for  $[(\text{CH}_3)_2\text{CHOC}(\text{S})\text{S}]_2$

| Atom  | x     | y    | z     | U(eq) |
|-------|-------|------|-------|-------|
| H(3)  | 8874  | 1760 | -3211 | 109   |
| H(4)  | 2709  | 1037 | -2030 | 86    |
| H(5A) | 6410  | 467  | -4441 | 209   |
| H(5B) | 7016  | 1362 | -5032 | 209   |
| H(5C) | 6289  | 1661 | -4124 | 209   |
| H(6A) | 3925  | 1962 | -3576 | 147   |
| H(6B) | 2214  | 1829 | -3893 | 147   |
| H(6C) | 3220  | 824  | -3751 | 147   |
| H(7A) | 8809  | -450 | -3609 | 208   |
| H(7B) | 10230 | 176  | -2795 | 208   |
| H(7C) | 9550  | 375  | -4177 | 208   |
| H(8A) | 3812  | 2469 | -758  | 137   |
| H(8B) | 2532  | 2858 | -1933 | 137   |
| H(8C) | 4198  | 2992 | -1776 | 137   |

**Table S6.** Torsion angles [°] for [(CH<sub>3</sub>)<sub>2</sub>CHOC(S)S]<sub>2</sub>

---

|                     |           |
|---------------------|-----------|
| C(1)-S(1)-S(2)-C(2) | -85.0(2)  |
| C(3)-O(1)-C(1)-S(3) | 2.3(6)    |
| C(3)-O(1)-C(1)-S(1) | -179.3(3) |
| S(2)-S(1)-C(1)-O(1) | 3.0(3)    |
| S(2)-S(1)-C(1)-S(3) | -178.4(2) |
| C(4)-O(2)-C(2)-S(4) | 0.1(5)    |
| C(4)-O(2)-C(2)-S(2) | 179.2(2)  |
| S(1)-S(2)-C(2)-O(2) | 4.4(3)    |
| S(1)-S(2)-C(2)-S(4) | -176.4(2) |
| C(1)-O(1)-C(3)-C(5) | -128.8(5) |
| C(1)-O(1)-C(3)-C(7) | 109.8(5)  |
| C(2)-O(2)-C(4)-C(6) | -85.7(4)  |
| C(2)-O(2)-C(4)-C(8) | 152.5(3)  |

---

**Table S7.** Comparison of the  $^1\text{H}$  NMR chemical shifts ( $\delta$ , in ppm) of different dixanthogen molecules

| Compound                                                                | $\delta$ CH <sub>3</sub> . | $\delta$ CH <sub>2</sub> | $\delta$ CH <sub>2</sub> -O | Reference        |
|-------------------------------------------------------------------------|----------------------------|--------------------------|-----------------------------|------------------|
| [CH <sub>3</sub> CH <sub>2</sub> OC(S)S] <sub>2</sub>                   | 1.42 (t, J=7.2)            | -                        | 4.70 (q, J=7.2)             | Reference 2      |
| [CH <sub>3</sub> (CH <sub>2</sub> ) <sub>2</sub> OC(S)S] <sub>2</sub>   | 0.98 (t, J=7.3)            | 1.73-1.91 (m)            | 4.55 (t, J=6.3)             | <b>This work</b> |
| [(CH <sub>3</sub> ) <sub>2</sub> CHOC(S)S] <sub>2</sub>                 | 1.40 (d, J= 3.2)           | -                        | -                           | Reference 2      |
| [(CH <sub>3</sub> ) <sub>2</sub> CHCH <sub>2</sub> OC(S)S] <sub>2</sub> | 1.0 (d, J= 6.8)            | -                        | 4.36 (d, J=7.2)             | Reference 2      |

**Table S8.** Comparison of the  $^{13}\text{C}$  NMR chemical shifts ( $\delta$ , in ppm) of different dixanthogen molecules

| Compound                                                                | $\delta$ CH <sub>3</sub> . | $\delta$ CH <sub>2</sub> | $\delta$ CH <sub>2</sub> -O | $\delta$ CS <sub>2</sub> | Reference        |
|-------------------------------------------------------------------------|----------------------------|--------------------------|-----------------------------|--------------------------|------------------|
| [CH <sub>3</sub> CH <sub>2</sub> OC(S)S] <sub>2</sub>                   | 13.8                       | -                        | 71.8                        | 207.1                    | Reference 2      |
| [CH <sub>3</sub> (CH <sub>2</sub> ) <sub>2</sub> OC(S)S] <sub>2</sub>   | <b>10.7</b>                | <b>21.8</b>              | <b>76.7</b>                 | <b>207.6</b>             | <b>This work</b> |
| [(CH <sub>3</sub> ) <sub>2</sub> CHOC(S)S] <sub>2</sub>                 | 21.3                       | -                        | -                           | 207.1                    | Reference 2      |
| [(CH <sub>3</sub> ) <sub>2</sub> CHCH <sub>2</sub> OC(S)S] <sub>2</sub> | 19.1                       | -                        | 81.3                        | 207.1                    | Reference 2      |

**Table S9.** Parameters used in the gas Chromatography – Mass Spectrometry measurements

---

|                                        |                                    |                 |
|----------------------------------------|------------------------------------|-----------------|
| Carrier gas:                           | He                                 |                 |
| Column:                                | 19091J-433 HP-5                    |                 |
| Length:                                | 30 m                               |                 |
| I.D:                                   | 0.25 mm                            |                 |
| Film:                                  | 0.25 $\mu\text{m}$                 |                 |
| Injection volume:                      | 1 $\mu\text{l}$                    |                 |
| Column oven temperature:               | 100 $^{\circ}\text{C}$             |                 |
| Injection temperature:                 | 200 $^{\circ}\text{C}$             |                 |
| Injection mode:                        | Split                              |                 |
| Flow control mode:                     | Pressure                           |                 |
| Pressure:                              | 120.0 kPa                          |                 |
| Total flow:                            | 43.8 ml/min                        |                 |
| Column flow:                           | 1.94 ml/min                        |                 |
| Linear velocity:                       | 50.9 cm/s                          |                 |
| Purge flow:                            | 3.0 ml/min                         |                 |
| Split ratio:                           | 20.0                               |                 |
| Oven temperature program:              |                                    |                 |
| Rate ( $^{\circ}\text{C}/\text{min}$ ) | Temperature ( $^{\circ}\text{C}$ ) | Hold time (min) |
| -                                      | 100                                | 2               |
| 20                                     | 150                                | 1               |
| 25                                     | 300                                | 2               |
| Ions source temperature:               | 200.0 $^{\circ}\text{C}$           |                 |
| Interface temperature:                 | 250.0 $^{\circ}\text{C}$           |                 |
| Solvent cut time:                      | 3 min                              |                 |
| Acquisition mass range:                | 2 - 500                            |                 |
| Ionization energy:                     | 70 eV                              |                 |

---

**Table S10.** Fragments observed in the mass spectra of  $[\text{CH}_3(\text{CH}_2)_2\text{OC}(\text{S})\text{S}]_2$  and  $[(\text{CH}_3)_2\text{CHOC}(\text{S})\text{S}]_2$ , relative intensity and assignment

| m/z | Relative Intensity                                          |                                                    | Assignment                                                |
|-----|-------------------------------------------------------------|----------------------------------------------------|-----------------------------------------------------------|
|     | $[\text{CH}_3(\text{CH}_2)_2\text{OC}(\text{S})\text{S}]_2$ | $[(\text{CH}_3)_2\text{CHOC}(\text{S})\text{S}]_2$ |                                                           |
| 15  | 0.7                                                         | 0.9                                                | $\text{CH}_3^+$                                           |
| 26  | 0.8                                                         | -                                                  | $\text{C}_2\text{H}_2^+$                                  |
| 27  | 19.0                                                        | 10.1                                               | $\text{C}_2\text{H}_3^+$                                  |
| 28  | 2.5                                                         | 1.4                                                | $\text{C}_2\text{H}_4^+ / \text{CO}^+$                    |
| 29  | 2.5                                                         | -                                                  | $\text{CH}_3\text{CH}_2^+$                                |
| 30  | 0.3                                                         | -                                                  | $\text{CH}_2\text{O}^+$                                   |
| 31  | 1.3                                                         |                                                    | $\text{CH}_3\text{O}^+$                                   |
| 32  | 1.9                                                         | 1.6                                                | $\text{S}^+$                                              |
| 38  | -                                                           | 0.5                                                | $\text{C}_3\text{H}_2^+$                                  |
| 39  | 6.2                                                         | 3.6                                                | $\text{C}_3\text{H}_3^+$                                  |
| 40  | 0.9                                                         | 0.8                                                | $\text{C}_3\text{H}_4^+$                                  |
| 41  | 33.2                                                        | 19.5                                               | $\text{C}_3\text{H}_5^+$                                  |
| 42  | 3.4                                                         | 3.0                                                | $\text{C}_3\text{H}_6^+ / \text{C}_2\text{H}_2\text{O}^+$ |
| 43  | 100.0                                                       | 100.0                                              | $\text{C}_3\text{H}_7^+$                                  |
| 44  | 4.1                                                         | 4.1                                                | $\text{CS}^+$                                             |
| 45  | 1.1                                                         | 1.6                                                | $\text{CHS}^+$                                            |
| 47  | 0.9                                                         | -                                                  | $\text{CH}_3\text{S}^+$                                   |
| 59  | 0.5                                                         | 1.2                                                | $\text{C}_3\text{H}_7\text{O}^+$                          |
| 60  | 1.9                                                         | 3.8                                                | $\text{OCS}^+$                                            |
| 61  | 0.8                                                         | 0.8                                                | $\text{OCSH}^+$                                           |
| 64  | 1.5                                                         | 1.0                                                | $\text{SS}^+$                                             |
| 65  | 0.5                                                         | -                                                  | $\text{S}_2\text{H}^+$                                    |
| 66  | 2.4                                                         | 2.7                                                | $\text{S}_2\text{H}_2^+$                                  |
| 75  | 1.4                                                         | 1.2                                                | $\text{C}_3\text{H}_7\text{S}^+$                          |
| 76  | 5.1                                                         | 3.8                                                | $\text{CS}_2^+$                                           |
| 77  | 1.4                                                         | 0.6                                                | $\text{CS}_2\text{H}^+$                                   |
| 78  | 0.7                                                         | -                                                  | $\text{CS}_2\text{H}_2^+$                                 |
| 92  | 0.7                                                         | -                                                  | $\text{OCS}_2^+$                                          |



| m/z | Relative Intensity                                          |                                                    | Assignment                                         |
|-----|-------------------------------------------------------------|----------------------------------------------------|----------------------------------------------------|
|     | $[\text{CH}_3(\text{CH}_2)_2\text{OC}(\text{S})\text{S}]_2$ | $[(\text{CH}_3)_2\text{CHOC}(\text{S})\text{S}]_2$ |                                                    |
| 93  | 0.8                                                         | 1.1                                                | $\text{OCS}_2\text{H}^+$                           |
| 95  | 0.7                                                         | -                                                  | $\text{CH}_3\text{OSS}^+$                          |
| 103 | 2.7                                                         | 3.0                                                | $\text{C}_3\text{H}_7\text{OCS}^+$                 |
| 108 | 8.0                                                         | 16.4                                               | $\text{CS}_3^+$                                    |
| 109 | 0.5                                                         | 0.8                                                | $\text{CS}_3\text{H}^+$                            |
| 110 | 0.8                                                         | 1.5                                                | $\text{CS}_3\text{H}_2^+$                          |
| 126 | -                                                           | 1.2                                                | $\text{OCS}_3\text{H}_2^+$                         |
| 135 | 0.5                                                         | -                                                  | $\text{C}_3\text{H}_7\text{OCS}_2^+$               |
| 136 | 0.6                                                         | 0.8                                                | $\text{OC}_2\text{S}_3^+$                          |
| 168 | 2.8                                                         | 5.4                                                | $\text{OC}_2\text{S}_4^+$                          |
| 270 | 0.8                                                         | 0.8                                                | $\text{M}^+, [\text{C}_3\text{H}_7\text{OCS}_2]^+$ |

**Table S11.** Dihedral angles and relative energies of the most stable conformations of [CH<sub>3</sub>(CH<sub>2</sub>)<sub>2</sub>OC(S)S]<sub>2</sub> calculated with the B3LYP/6-31+G\* approximation

| Conformer                                  | $\tau_{C(9)C(6)C(3)O(2)}$ | $\tau_{C(6)C(3)O(2)C(1)}$ | $\tau_{S(14)C(1)S(13)S(18)}$ | $\tau_{C(1)S(13)S(18)C(16)}$ | $\tau_{S(13)S(18)C(16)S(15)}$ | $\tau_{C(16)O(17)C(19)C(22)}$ | $\tau_{O(17)C(19)C(22)C(25)}$ | $\Delta E$ (kcal mol <sup>-1</sup> ) |
|--------------------------------------------|---------------------------|---------------------------|------------------------------|------------------------------|-------------------------------|-------------------------------|-------------------------------|--------------------------------------|
| I (AAAGAAA)                                | 179.9                     | -178.9                    | <b>177.1</b>                 | 85.1                         | <b>177.1</b>                  | -178.9                        | 179.9                         | <b>0.00</b>                          |
| II (AAAGAAG <sup>+</sup> )                 | 179.9                     | -178.5                    | <b>177.1</b>                 | 84.2                         | <b>177.0</b>                  | -178.6                        | 65.0                          | <b>0.08</b>                          |
| III (G <sup>+</sup> AAGAAG <sup>-</sup> )  | 64.6                      | -178.5                    | <b>177.4</b>                 | 86.6                         | <b>177.6</b>                  | -178.1                        | -65.4                         | <b>0.26</b>                          |
| IV (AASGAAA)                               | 179.9                     | 179.8                     | <b>-6.3</b>                  | 85.3                         | <b>176.3</b>                  | 179.0                         | 180.0                         | <b>1.54</b>                          |
| V (AAAGSAG <sup>+</sup> )                  | 179.6                     | -179.1                    | <b>176.5</b>                 | 85.6                         | <b>-5.5</b>                   | -179.0                        | 65.4                          | <b>1.58</b>                          |
| VI (AASGAAG <sup>+</sup> )                 | -179.9                    | -179.0                    | <b>-5.0</b>                  | 85.3                         | <b>176.4</b>                  | -179.8                        | 64.5                          | <b>1.59</b>                          |
| VII (G <sup>+</sup> AAGSAG <sup>-</sup> )  | 64.4                      | -179.7                    | <b>176.6</b>                 | 85.5                         | <b>-5.2</b>                   | -179.1                        | -64.4                         | <b>1.66</b>                          |
| VIII (G <sup>+</sup> ASGAAG <sup>-</sup> ) | 65.5                      | 180.0                     | <b>-6.3</b>                  | 87.4                         | <b>175.1</b>                  | 178.1                         | -67.0                         | <b>1.80</b>                          |
| IX (AASGSAA)                               | 180.0                     | -179.6                    | <b>-3.3</b>                  | 88.8                         | <b>-3.3</b>                   | -179.5                        | 180.0                         | <b>2.84</b>                          |
| X (AASGSAG <sup>+</sup> )                  | 179.9                     | -179.6                    | <b>-2.5</b>                  | 88.9                         | <b>-3.7</b>                   | -179.7                        | 64.7                          | <b>2.92</b>                          |
| XI (G <sup>+</sup> ASGSAG <sup>-</sup> )   | 65.0                      | -179.1                    | <b>-2.9</b>                  | 88.7                         | <b>-2.6</b>                   | -179.3                        | -64.7                         | <b>2.98</b>                          |

A, S and G denote *anti*, *syn* and *gauche*, respectively

**Table S12.** Dihedral angles and relative energies of the most stable conformations of  $[(\text{CH}_3)_2\text{CHOC}(\text{S})\text{S}]_2$  calculated with the B3LYP/6-31+G\* approximation

| Conformer | $\tau_{\text{S}(13)\text{C}(12)\text{S}(14)\text{S}(15)}$ | $\tau_{\text{C}(12)\text{S}(14)\text{S}(15)\text{C}(16)}$ | $\tau_{\text{S}(14)\text{S}(15)\text{C}(16)\text{S}(17)}$ | $\Delta E$ (kcal mol <sup>-1</sup> ) |
|-----------|-----------------------------------------------------------|-----------------------------------------------------------|-----------------------------------------------------------|--------------------------------------|
| I (AGA)   | <b>178.1</b>                                              | 86.2                                                      | <b>178.1</b>                                              | <b>0.00</b>                          |
| II (SGA)  | <b>-6.9</b>                                               | 86.7                                                      | <b>175.5</b>                                              | <b>1.56</b>                          |
| III (SGS) | <b>-2.7</b>                                               | 89.2                                                      | <b>-2.8</b>                                               | <b>2.90</b>                          |

A, S and G denote *anti*, *syn* and *gauche*, respectively

**Table S13.** Net atomic charges obtained by Mulliken population analysis and dipole moments and of  $[\text{CH}_3(\text{CH}_2)_2\text{OC}(\text{S})\text{S}]_2$  and  $[(\text{CH}_3)_2\text{CHOC}(\text{S})\text{S}]_2$ , calculated with the B3LYP/6-31+G\* approximation

| Atom  | Net Charge [e]                                              |                                                    |
|-------|-------------------------------------------------------------|----------------------------------------------------|
|       | $[\text{CH}_3(\text{CH}_2)_2\text{OC}(\text{S})\text{S}]_2$ | $[(\text{CH}_3)_2\text{CHOC}(\text{S})\text{S}]_2$ |
| S(1)  | 0.273                                                       | 0.279                                              |
| S(2)  | 0.273                                                       | 0.279                                              |
| C(1)  | -0.318                                                      | -0.272                                             |
| C(2)  | -0.318                                                      | -0.272                                             |
| S(3)  | -0.044                                                      | -0.169                                             |
| S(4)  | -0.044                                                      | -0.169                                             |
| O(1)  | 0.139                                                       | -0.071                                             |
| O(2)  | 0.139                                                       | -0.071                                             |
| C(3)  | -0.127                                                      | -0.127                                             |
| H(3A) | 0.228                                                       | 0.241                                              |
| H(3B) | 0.224                                                       | -                                                  |
| C(4)  | -0.127                                                      | -0.127                                             |
| H(4A) | 0.228                                                       | 0.241                                              |
| H(4B) | 0.224                                                       | -                                                  |
| C(5)  | -0.506                                                      | -0.585                                             |
| H(5A) | 0.206                                                       | 0.228                                              |
| H(5B) | 0.217                                                       | 0.230                                              |
| H(5C) | -                                                           | 0.231                                              |
| C(6)  | -0.506                                                      | -0.585                                             |
| H(6A) | 0.206                                                       | 0.228                                              |
| H(6B) | 0.217                                                       | 0.230                                              |
| H(6C) | -                                                           | 0.231                                              |
| C(7)  | -0.651                                                      | -0.669                                             |
| H(7A) | 0.203                                                       | 0.221                                              |
| H(7B) | 0.231                                                       | 0.229                                              |
| H(7C) | 0.205                                                       | 0.233                                              |
| C(8)  | -0.651                                                      | -0.669                                             |

*continuation of the Table S13*

| Atom                              | Net Charge [e]                                              |                                                    |
|-----------------------------------|-------------------------------------------------------------|----------------------------------------------------|
|                                   | $[\text{CH}_3(\text{CH}_2)_2\text{OC}(\text{S})\text{S}]_2$ | $[(\text{CH}_3)_2\text{CHOC}(\text{S})\text{S}]_2$ |
| H(8A)                             | 0.203                                                       | 0.221                                              |
| H(8B)                             | 0.231                                                       | 0.229                                              |
| H(8C)                             | 0.205                                                       | 0.233                                              |
| Dipole moment<br>( $\mu$ , Debye) | 3.66                                                        | 4.69                                               |

**Table S14.** Experimental (IR and Raman) and calculated (for the most stable conformers) wavenumbers (cm<sup>-1</sup>), relative intensities and tentative assignments of [CH<sub>3</sub>(CH<sub>2</sub>)<sub>2</sub>OC(S)S]<sub>2</sub>

| Experimental |      | B3LYP/6-31+G* |                 |                    |              |                 |                    |               |                 |                    | Assignment                                                                                         |
|--------------|------|---------------|-----------------|--------------------|--------------|-----------------|--------------------|---------------|-----------------|--------------------|----------------------------------------------------------------------------------------------------|
|              |      | Structure I   |                 |                    | Structure II |                 |                    | Structure III |                 |                    |                                                                                                    |
| IR           | Ra   | $\nu$         | I <sub>IR</sub> | I <sub>Raman</sub> | $\nu$        | I <sub>IR</sub> | I <sub>Raman</sub> | $\nu$         | I <sub>IR</sub> | I <sub>Raman</sub> |                                                                                                    |
| 2969         | 2970 | 3129          | 5               | 9                  | 3129         | 4               | 19                 | 3130          | 5               | 18                 | v <sub>as</sub> CH <sub>3</sub> ; v <sub>as</sub> CH <sub>2</sub>                                  |
|              |      | 3129          | 7               | 2                  | 3129         | 7               | 13                 | 3129          | 4               | 26                 |                                                                                                    |
|              |      |               |                 |                    | 3127         | 3               | 18                 | 3128          | 1               | 15                 |                                                                                                    |
|              |      |               |                 |                    |              |                 |                    | 3128          | 6               | 28                 |                                                                                                    |
| 2948         | 2948 | 3119          | 8               | 34                 | 3119         | 4               | 67                 |               |                 |                    |                                                                                                    |
|              |      | 3119          | <1              | 36                 |              |                 |                    |               |                 |                    |                                                                                                    |
| 2936         | 2934 |               |                 |                    | 3110         | 4               | 42                 | 3110          | 5               | 41                 |                                                                                                    |
|              |      |               |                 |                    |              |                 |                    | 3110          | 4               | 44                 |                                                                                                    |
| 2922         |      | 3107          | 3               | 5                  | 3107         | 4               | 5                  |               |                 |                    |                                                                                                    |
|              |      | 3107          | 4               | <1                 |              |                 |                    |               |                 |                    |                                                                                                    |
| 2885         | 2878 | 3084          | <1              | 49                 | 3084         | <1              | 68                 | 3083          | 2               | 80                 |                                                                                                    |
|              |      | 3084          | <1              | 24                 | 3080         | 3               | 71                 | 3081          | 3               | 69                 |                                                                                                    |
| 2878         |      | 3073          | 2               | 40                 | 3073         | 2               | 38                 | 3071          | <1              | 60                 |                                                                                                    |
|              |      | 3073          | 3               | 1                  | 3070         | <1              | 57                 | 3070          | <1              | 57                 |                                                                                                    |
| 2852         | 2852 | 3055          | 3               | 8                  | 3055         | 2               | 55                 | 3047          | 4               | 97                 | v <sub>s</sub> CH <sub>3</sub> ; v <sub>as</sub> CH <sub>2</sub> ; v <sub>as</sub> CH <sub>2</sub> |
|              |      | 3055          | 1               | 50                 | 3047         | 4               | 100                | 3046          | 3               | 100                |                                                                                                    |
|              |      | 3044          | 4               | 100                | 3044         | 4               | 94                 | 3043          | 4               | 88                 |                                                                                                    |
|              |      | 3044          | 4               | <1                 | 3041         | 3               | 82                 | 3042          | 4               | 80                 |                                                                                                    |
| 2776         |      |               |                 |                    |              |                 |                    |               |                 |                    |                                                                                                    |
| 2738         | 2737 |               |                 |                    |              |                 |                    |               |                 |                    |                                                                                                    |
| 2682         |      |               |                 |                    |              |                 |                    |               |                 |                    |                                                                                                    |
| 2613         |      |               |                 |                    |              |                 |                    |               |                 |                    |                                                                                                    |
| 2506         |      |               |                 |                    |              |                 |                    |               |                 |                    |                                                                                                    |
| 2288         |      |               |                 |                    |              |                 |                    |               |                 |                    |                                                                                                    |
| 2049         |      |               |                 |                    |              |                 |                    |               |                 |                    |                                                                                                    |
| 1948         |      |               |                 |                    |              |                 |                    |               |                 |                    |                                                                                                    |
| 1916         |      |               |                 |                    |              |                 |                    |               |                 |                    |                                                                                                    |

Overtone and Combination Bands



continuation of the Table S14

| Experimental |         | B3LYP/6-31+G* |          |             |              |          |             |               |          |             | Assignment |
|--------------|---------|---------------|----------|-------------|--------------|----------|-------------|---------------|----------|-------------|------------|
|              |         | Structure I   |          |             | Structure II |          |             | Structure III |          |             |            |
| IR           | Ra      | $\nu$         | $I_{IR}$ | $I_{Raman}$ | $\nu$        | $I_{IR}$ | $I_{Raman}$ | $\nu$         | $I_{IR}$ | $I_{Raman}$ |            |
| 1143         |         | 1186          | <1       | <1          | 1187         | <1       | 1           | 1174          | 1        | 1           |            |
|              |         | 1186          | <1       | 1           | 1173         | 1        | 1           | 1173          | 1        | <1          |            |
| 1130         |         | 1152          | 4        | 1           | 1152         | 4        | 2           |               |          |             |            |
|              |         | 1151          | 4        | 1           |              |          |             |               |          |             |            |
| 1103         |         |               |          |             | 1130         | 3        | 1           | 1130          | 2        | 1           |            |
|              |         |               |          |             |              |          |             | 1130          | 4        | 1           |            |
| 1049         |         |               |          |             | 1071         | 8        | 3           | 1072          | 8        | 3           |            |
|              |         |               |          |             |              |          |             | 1069          | 6        | 2           |            |
| 1036         | 1036    | 1060          | 24       | 18          | 1055         | 23       | 30          | 1047          | 18       | 37          |            |
|              |         | 1051          | 11       | 4           |              |          |             |               |          |             |            |
|              |         | 1049          | 4        | 5           | 1049         | 6        | 9           |               |          |             |            |
| 1018         | 1018 sh | 1042          | 77       | 1           | 1036         | 75       | 6           | 1032          | 85       | 3           |            |
| 934          | 934     |               |          |             |              |          |             |               |          |             |            |
| 920          | 918     | 954           | 12       | 1           | 953          | 7        | 5           |               |          |             |            |
|              |         | 953           | 2        | 5           |              |          |             |               |          |             |            |
| 894          | 888     |               |          |             | 939          | 3        | 3           | 939           | 5        | 3           |            |
|              |         |               |          |             |              |          |             | 937           | 2        | 3           |            |
|              |         |               |          |             |              |          |             | 911           | 3        | 4           |            |
|              |         |               |          |             |              |          |             | 910           | 1        | 3           |            |
| 865          | 865     | 902           | 1        | 1           | 909          | 2        | 4           |               |          |             |            |
|              |         | 902           | <1       | 2           | 903          | <1       | <1          |               |          |             |            |
|              |         | 902           | <1       | 9           | 902          | 2        | 13          |               |          |             |            |
|              |         | 902           | 3        | 3           |              |          |             |               |          |             |            |
| 856          |         |               |          |             | 873          | 1        | 10          | 874           | 2        | 2           |            |
|              |         |               |          |             |              |          |             | 874           | <1       | 19          |            |
| 770          | 767     |               |          |             | 780          | 1        | <1          | 781           | 1        | <1          |            |
|              |         |               |          |             |              |          |             | 778           | 1        | <1          |            |
| 758          |         | 768           | <1       | <1          | 770          | <1       | <1          |               |          |             |            |
|              |         | 768           | <1       | <1          |              |          |             |               |          |             |            |
| 690          | 688     | 699           | 1        | <1          | 699          | 1        | 2           |               |          |             |            |



continuation of the Table S14

| Experimental |     | B3LYP/6-31+G* |                 |                    |              |                 |                    |               |                 |                    | Assignment                     |
|--------------|-----|---------------|-----------------|--------------------|--------------|-----------------|--------------------|---------------|-----------------|--------------------|--------------------------------|
|              |     | Structure I   |                 |                    | Structure II |                 |                    | Structure III |                 |                    |                                |
| IR           | Ra  | $\nu$         | I <sub>IR</sub> | I <sub>Raman</sub> | $\nu$        | I <sub>IR</sub> | I <sub>Raman</sub> | $\nu$         | I <sub>IR</sub> | I <sub>Raman</sub> |                                |
|              |     | 699           | <1              | 3                  |              |                 |                    |               |                 |                    |                                |
|              | 670 |               |                 |                    | 695          | <1              | 4                  | 695           | <1              | 3                  |                                |
|              |     |               |                 |                    |              |                 |                    | 694           | <1              | 4                  |                                |
| 648          | 648 | 570           | <1              | <1                 | 570          | <1              | <1                 | 571           | <1              | 1                  | $\delta$ OCS <sub>i.p.</sub>   |
| 617          |     | 546           | <1              | <1                 | 546          | <1              | <1                 | 547           | <1              | <1                 | $\delta$ OCS <sub>o.f.p.</sub> |
| 564          | 561 | 496           | <1              | 2                  | 492          | <1              | 4                  |               |                 |                    | $\delta$ OCS <sub>i.p.</sub>   |
| 542          | 543 | 487           | <1              | 1                  |              |                 |                    |               |                 |                    | $\delta$ OCS <sub>o.f.p.</sub> |
| 530          | 529 |               |                 |                    | 461          | <1              | 17                 | 471           | <1              | 20                 | $\nu$ S-S                      |
|              |     |               |                 |                    |              |                 |                    | 450           | <1              | <1                 | $\delta$ OCS                   |
|              | 498 | 444           | <1              | 25                 |              |                 |                    |               |                 |                    | $\nu$ S-S                      |
|              |     |               |                 |                    | 442          | <1              | 18                 | 442           | <1              | 14                 | $\rho$ CH <sub>3</sub>         |
|              | 478 |               |                 |                    |              |                 |                    | 426           | 1               | 4                  | $\delta$ OCS                   |
| 454          | 451 |               |                 |                    | 419          | <1              | 18                 | 413           | <1              | 24                 |                                |
| 423          | 423 | 359           | 1               | 1                  | 356          | 1               | 5                  |               |                 |                    | $\delta$ COC                   |
|              |     | 353           | 1               | 4                  |              |                 |                    |               |                 |                    |                                |
| 414          |     |               |                 |                    |              |                 |                    | 328           | 1               | <1                 |                                |
| 394          |     | 320           | 1               | 1                  | 325          | 1               | 2                  |               |                 |                    | $\delta$ SCS; $\delta$ CCC     |
| 360          | 360 |               |                 |                    | 302          | <1              | 5                  | 309           | <1              | 4                  |                                |
| 326          | 325 | 291           | <1              | 6                  |              |                 |                    | 291           | <1              | 4                  | $\tau$ HCCC                    |
|              | 307 | 270           | 1               | <1                 | 277          | 1               | 4                  |               |                 |                    | $\delta$ SCS; $\delta$ CCC     |
| 291          |     | 235           | <1              | <1                 | 239          | <1              | <1                 | 235           | <1              | 8                  |                                |
|              |     | 235           | <1              | <1                 |              |                 |                    |               |                 |                    | $\tau$ HCCC                    |
| 274          |     |               |                 |                    | 226          | <1              | 5                  | 221           | 1               | 1                  |                                |
| 240          |     | 208           | <1              | 3                  | 215          | <1              | 1                  | 215           | <1              | 1                  | $\delta$ SCS                   |
| 220          | 221 | 192           | <1              | 1                  | 194          | <1              | 3                  | 193           | <1              | <1                 | $\tau$ COCS                    |

**Table S15.** Experimental (IR and Raman) and calculated (for the most stable conformer) wavenumbers ( $\text{cm}^{-1}$ ), relative intensities and tentative assignments of  $[(\text{CH}_3)_2\text{CHOC}(\text{S})\text{S}]_2$

| Experimental |          | B3LYP/6-31+G* |                 |                    | Assignment                                                           |
|--------------|----------|---------------|-----------------|--------------------|----------------------------------------------------------------------|
| FTIR         | FT-Raman | $\nu$         | $I_{\text{IR}}$ | $I_{\text{Raman}}$ |                                                                      |
|              |          | 3141          | 4               | 7                  |                                                                      |
|              |          | 3141          | <1              | 5                  |                                                                      |
| 2979         | 2982     | 3135          | 5               | 18                 |                                                                      |
|              |          | 3135          | 2               | 1                  |                                                                      |
| 2952         |          | 3129          | 2               | 7                  | $\nu_{\text{as}} \text{CH}_3$                                        |
|              | 2949     | 3129          | 8               | 39                 |                                                                      |
| 2932         | 2935     | 3121          | <1              | 4                  |                                                                      |
|              |          | 3121          | <1              | 1                  |                                                                      |
|              |          | 3101          | <1              | 4                  | $\nu \text{C-H}_{\text{o.f.p.}}$                                     |
| 2920         | 2920     | 3101          | <1              | 11                 | $\nu \text{C-H}_{\text{i.p.}}$                                       |
|              |          | 3059          | 2               | 100                |                                                                      |
| 2895         | 2895     | 3059          | 4               | 4                  |                                                                      |
|              | 2869     | 3055          | 1               | 2                  | $\nu_{\text{s}} \text{CH}_3$                                         |
| 2871         |          | 3055          | 3               | <1                 |                                                                      |
| 2816         |          |               |                 |                    |                                                                      |
| 2742         | 2743     |               |                 |                    |                                                                      |
| 2732         | 2733     |               |                 |                    |                                                                      |
| 2602         |          |               |                 |                    | $\nu \text{O-C}_{\text{o.f.p.}} + \delta \text{H-C-O}_{\text{i.p.}}$ |
| 2532         |          |               |                 |                    | $2 \nu \text{O-C}_{\text{o.f.p.}}$                                   |
| 2353         |          |               |                 |                    | $\nu \text{O-C}_{\text{o.f.p.}} + \delta \text{CH}_3\text{-C}$       |
| 2270         |          |               |                 |                    | $\nu \text{O-C}_{\text{o.f.p.}} + \nu \text{C=S}_{\text{o.f.p.}}$    |
| 2078         |          |               |                 |                    |                                                                      |
| 2022         |          |               |                 |                    | $\nu \text{C=S}_{\text{o.f.p.}} + \nu \text{C=S}_{\text{i.p.}}$      |
| 1956         |          |               |                 |                    | $\nu \text{O-C}_{\text{o.f.p.}} + \nu \text{C-S}_{\text{o.f.p.}}$    |
| 1878         |          |               |                 |                    |                                                                      |
| 1837         |          |               |                 |                    |                                                                      |
| 1798         |          |               |                 |                    |                                                                      |
| 1774         |          |               |                 |                    |                                                                      |
| 1703         |          |               |                 |                    |                                                                      |
| 1689         |          |               |                 |                    | $\nu \text{C=S}_{\text{o.f.p.}} + \nu \text{C-S}_{\text{o.f.p.}}$    |
| 1589         |          |               |                 |                    | $2 \nu \text{C-O}_{\text{o.f.p.}}$                                   |
|              |          | 1531          | 1               | <1                 |                                                                      |
| 1465         |          | 1530          | 2               | <1                 |                                                                      |
|              |          | 1518          | <1              | 5                  |                                                                      |
| 1457         | 1453     | 1518          | 2               | 1                  |                                                                      |
|              |          | 1508          | <1              | 4                  | $\delta \text{H-C-H}$                                                |
| 1448         | 1445     | 1508          | <1              | 1                  |                                                                      |
|              |          | 1504          | <1              | <1                 |                                                                      |
| 1419         |          | 1503          | <1)             | <1                 |                                                                      |
|              |          | 1444          | <1              | <1                 |                                                                      |
| 1387         | 1387     | 1444          | 4               | <1                 | $\delta \text{CH}_3$                                                 |
|              |          | 1429          | 1               | <1                 |                                                                      |
| 1373         |          | 1428          | 5               | <1                 |                                                                      |

| Experimental |          | B3LYP/6-31+G* |          |             | Assignment                           |
|--------------|----------|---------------|----------|-------------|--------------------------------------|
| FTIR         | FT-Raman | $\nu$         | $I_{IR}$ | $I_{Raman}$ |                                      |
| 1354         | 1351     | 1393          | 3        | 2           | $\delta$ H-C-O <sub>i.p.</sub>       |
|              |          | 1391          | 3        | 1           | $\delta$ H-C-O <sub>o.f.p.</sub>     |
| 1341         | 1340     | 1381          | <1       | 1           | $\delta$ H-C-C                       |
|              |          | 1381          | 2        | <1          |                                      |
|              | 1278     | 1306          | 26       | 2           | $\nu$ O-C <sub>i.p.</sub>            |
| 1272         | 1268     | 1301          | 100      | <1          | $\nu$ O-C <sub>o.f.p.</sub>          |
| 1186         |          | 1213          | 1        | <1          | $\delta$ CH <sub>3</sub> -C          |
|              | 1185     | 1213          | <1       | 1           |                                      |
| 1146         | 1147     | 1169          | <1       | <1          | $\nu_{as}$ C-C-C <sub>i.p.</sub>     |
|              |          | 1169          | 4        | 1           | $\nu_{as}$ C-C-C <sub>o.f.p.</sub>   |
| 1092         | 1089     | 1128          | 22       | 1           | $\delta$ CH <sub>3</sub> -C          |
| 1083         |          | 1123          | 27       | <1          |                                      |
| 1027         | 1019     | 1032          | 18       | 11          | $\nu$ C=S <sub>i.p.</sub>            |
| 1003         | 1003     | 1016          | 94       | 1           | $\nu$ C=S <sub>o.f.p.</sub>          |
| 939          | 942      | 958           | <1       | <1          | $\delta$ CH <sub>3</sub> -C          |
|              |          | 958           | 1        | <1          |                                      |
| 934          | 934      | 948           | <1       | <1          |                                      |
|              |          | 948           | <1       | <1          |                                      |
| 898          | 899      | 912           | 4        | 2           | $\nu_s$ C-C-C <sub>o.f.p.</sub>      |
|              |          | 912           | 2        | <1          | $\nu_s$ C-C-C <sub>i.p.</sub>        |
| 795          |          | 806           | 4        | <1          | $\nu$ C-O <sub>o.f.p.</sub>          |
|              | 796      | 804           | <1       | 4           | $\nu$ C-O <sub>i.p.</sub>            |
| 690          | 691      | 694           | 1        | <1          | $\nu$ C-S <sub>o.f.p.</sub>          |
|              |          | 694           | <1       | 2           | $\nu$ C-S <sub>i.p.</sub>            |
| 567          | 566      | 572           | <1       | <1          | $\delta_{oop}$ C=S <sub>o.f.p.</sub> |
| 545          | 548      | 549           | <1       | <1          | $\delta_{oop}$ C=S <sub>i.p.</sub>   |
|              | 501      | 478           | <1       | 3           | $\nu$ S-S                            |
| 468          | 467      | 464           | <1       | <1          | $\delta$ O-C=S <sub>o.f.p.</sub>     |
|              | 457      | 450           | <1       | 6           | $\delta$ C-O-C <sub>i.p.</sub>       |
|              |          | 443           | 1        | <1          | $\delta$ C-O-C <sub>o.f.p.</sub>     |
| 443          | 444      | 434           | 1        | 6           | $\delta$ S=C-S <sub>i.p.</sub>       |
| 396          |          | 391           | 1        | <1          | $\delta$ C-C-O <sub>o.f.p.</sub>     |
| 384          | 382      | 385           | <1       | 3           | $\delta$ C-C-O <sub>i.p.</sub>       |
| 331          | 330      | 328           | <1       | <1          | $\delta$ C-C-C <sub>o.f.p.</sub>     |
|              |          | 326           | <1       | 1           | $\delta$ C-C-C <sub>i.p.</sub>       |
| 305          | 302      | 301           | 1        | <1          | $\delta$ S=C-S <sub>o.f.p.</sub>     |
| 257          | 254      | 252           | <1       | 1           | $\tau$ H-C-C-H                       |
|              | 248      | 247           | <1       | <1          |                                      |
| 219          | 219      | 212           | <1       | 1           | $\delta$ O-C=S <sub>i.p.</sub>       |
|              |          | 211           | <1       | <1          | $\tau$ H-C-C-H                       |
| 206          |          | 210           | <1       | <1          |                                      |
|              |          | 196           | 1        | <1          | $\tau$ C-C-O-C                       |
| 200          | 200      | 190           | <1       | 3           |                                      |
|              |          | 142           | 126      | <1          | 1                                    |
|              | 128      | 114           | <1       | <1          |                                      |

**Table S16.** Wavelength ( $\lambda$ , nm) and oscillator strength of the mono-electronic transitions of  $[\text{CH}_3(\text{CH}_2)_2\text{OC}(\text{S})\text{S}]_2$  calculated with the TD-B3LYP/6-31+g (d) approximation

| N° | $\lambda(\text{nm})$ | Oscillator Strength | Major contribution                                                                    | Minor contribution                                                                                                                                |
|----|----------------------|---------------------|---------------------------------------------------------------------------------------|---------------------------------------------------------------------------------------------------------------------------------------------------|
| 5  | 280.5                | 0.047               | H-2->L+2 (40%), H-1->L+1 (35%), HOMO->LUMO (19%)                                      |                                                                                                                                                   |
| 9  | 265.3                | 0.1661              | H-3->L+1 (38%), H-2->LUMO (12%),<br>H-2->L+2 (20%), HOMO->LUMO (11%), HOMO->L+2 (10%) | H-1->L+1 (3%)                                                                                                                                     |
| 11 | 249.3                | 0.7099              | H-3->L+1 (48%), H-2->LUMO (10%), HOMO->L+2 (12%)                                      | H-5->L+1 (3%), H-4->LUMO (3%), H-2->L+2 (6%),<br>H-1->L+1 (4%)                                                                                    |
| 12 | 236.4                | 0.0752              | H-3->LUMO (28%), H-3->L+2 (24%), H-2->L+1 (10%), H-1->L+2 (10%)                       | H-5->LUMO (3%), H-4->L+1 (6%)                                                                                                                     |
| 15 | 218.2                | 0.0355              | H-5->L+1 (26%), H-4->LUMO (67%)                                                       | H-4->L+2 (2%)                                                                                                                                     |
| 18 | 209.6                | 0.159               | H-5->L+1 (59%), H-4->LUMO (16%)                                                       | H-1->L+3 (5%)                                                                                                                                     |
| 19 | 208.5                | 0.0546              | H-5->LUMO (14%), HOMO->L+3 (66%)                                                      | H-4->L+1 (8%), HOMO->L+4 (3%)                                                                                                                     |
| 20 | 203.3                | 0.0568              | H-1->L+3 (76%)                                                                        | H-5->L+1 (2%), H-1->L+4 (5%), HOMO->L+5 (6%)                                                                                                      |
| 21 | 199.4                | 0.0817              | HOMO->L+5 (75%)                                                                       | H-3->L+3 (5%), H-3->L+4 (2%), H-1->L+3 (5%),<br>HOMO->L+6 (3%)                                                                                    |
| 26 | 193.1                | 0.141               | H-3->L+3 (14%), H-1->L+4 (32%), HOMO->L+6 (11%), HOMO->L+7 (11%)                      | H-7->L+1 (3%), H-6->LUMO (3%), H-2->L+5 (8%),<br>H-1->L+3 (3%), H-1->L+8 (3%)                                                                     |
| 31 | 184.9                | 0.0113              | H-2->L+4 (26%), H-1->L+5 (16%), H-1->L+7 (12%), HOMO->L+8 (20%)                       | H-1->L+6 (7%), HOMO->L+4 (3%), HOMO->L+9 (6%)                                                                                                     |
| 32 | 184.8                | 0.0097              | H-2->L+5 (14%), HOMO->L+6 (36%), HOMO->L+7 (35%)                                      | H-1->L+4 (6%)                                                                                                                                     |
| 35 | 182.4                | 0.0105              | H-2->L+4 (19%), H-1->L+6 (12%), HOMO->L+9 (32%)                                       | H-2->L+3 (3%), H-2->L+8 (3%), H-1->L+5 (5%),<br>H-1->L+7 (5%), HOMO->L+10 (6%)                                                                    |
| 36 | 182.0                | 0.0223              | H-9->L+1 (10%), H-7->LUMO (16%), H-6->L+1 (54%)                                       | H-12->L+1 (3%), H-11->L+1 (2%), H-10->LUMO (4%),<br>H-8->LUMO (6%)                                                                                |
| 37 | 181.2                | 0.0101              | H-6->L+2 (24%), H-1->L+8 (43%)                                                        | H-12->L+2 (3%), H-3->L+3 (2%), H-1->L+4 (7%),<br>HOMO->L+11 (2%), HOMO->L+13 (3%)                                                                 |
| 40 | 179.4                | 0.0411              | H-6->L+2 (28%), H-3->L+4 (11%), H-1->L+8 (21%)                                        | H-9->L+2 (2%), H-2->L+5 (5%), H-2->L+6 (5%),<br>H-2->L+7 (4%), HOMO->L+13 (3%)                                                                    |
| 41 | 179.2                | 0.0097              | H-3->L+5 (18%), H-1->L+6 (39%), H-1->L+7 (15%)                                        | H-2->L+8 (5%), HOMO->L+9 (4%), HOMO->L+12 (5%)                                                                                                    |
| 42 | 179.0                | 0.0229              | H-9->LUMO (43%), H-7->L+1 (36%)                                                       | H-10->L+1 (6%), H-8->L+1 (5%), H-6->L+2 (2%)                                                                                                      |
| 46 | 177.9                | 0.0254              | H-6->L+2 (11%), H-3->L+4 (13%), H-2->L+7 (11%), H-1->L+9 (10%)                        | H-14->L+2 (2%), H-12->LUMO (2%), H-11->LUMO (4%),<br>H-9->L+2 (4%), H-8->L+1 (9%), H-6->LUMO (3%),<br>H-2->L+5 (7%), H-2->L+6 (9%), H-1->L+8 (4%) |
| 49 | 175.2                | 0.0146              | H-2->L+8 (55%), HOMO->L+10 (19%)                                                      | H-3->L+5 (5%), H-2->L+4 (4%), H-1->L+13 (2%)                                                                                                      |
| 50 | 175.0                | 0.0311              | H-2->L+6 (26%), HOMO->L+11 (15%), HOMO->L+13 (24%)                                    | H-3->L+8 (9%), H-1->L+8 (3%), HOMO->L+14 (5%)                                                                                                     |
| 51 | 174.6                | 0.0113              | H-2->L+8 (12%), HOMO->L+9 (13%), HOMO->L+10 (57%)                                     | H-3->L+5 (3%), H-1->L+7 (4%)                                                                                                                      |
| 56 | 173.4                | 0.0308              | H-2->L+6 (11%), H-2->L+7 (56%)                                                        | H-2->L+13 (2%), H-1->L+9 (5%), H-1->L+10 (5%),<br>HOMO->L+14 (6%)                                                                                 |

| N° | $\lambda(\text{nm})$ | Oscillator Strength | Major contribution                                                                | Minor contribution                                                                                                                          |
|----|----------------------|---------------------|-----------------------------------------------------------------------------------|---------------------------------------------------------------------------------------------------------------------------------------------|
| 59 | 172.3                | 0.0124              | H-3->L+6 (12%), HOMO->L+12 (58%)                                                  | H-2->L+9 (3%), H-1->L+13 (3%), H-1->L+14 (4%)                                                                                               |
| 60 | 172.0                | 0.0227              | H-9->L+2 (71%), H-6->L+2 (10%)                                                    | H-11->L+2 (9%), H-3->L+4 (2%)                                                                                                               |
| 65 | 169.6                | 0.0387              | H-11->L+2 (45%), H-1->L+10 (33%)                                                  | H-9->L+2 (4%)                                                                                                                               |
| 66 | 169.1                | 0.0122              | H-11->L+2 (27%), H-1->L+10 (29%)                                                  | H-9->L+2 (6%), H-1->L+9 (8%), HOMO->L+13 (6%), HOMO->L+14 (9%)                                                                              |
| 69 | 168.5                | 0.0124              | H-14->LUMO (28%), H-13->L+1 (38%)                                                 | H-12->LUMO (4%), H-8->L+1 (6%), H-7->L+1 (4%), H-3->L+8 (3%), HOMO->L+13 (2%), HOMO->L+14 (5%)                                              |
| 74 | 167.1                | 0.0178              | H-3->L+8 (29%), H-1->L+12 (13%), HOMO->L+13 (22%), HOMO->L+14 (10%)               | H-12->L+2 (3%), H-11->L+2 (2%), H-3->L+4 (2%), H-1->L+10 (5%), HOMO->L+16 (3%)                                                              |
| 78 | 165.3                | 0.0195              | H-12->L+2 (47%)                                                                   | H-14->L+2 (6%), H-6->L+2 (2%), H-5->L+3 (8%), H-4->L+5 (2%), H-3->L+8 (5%), H-2->L+11 (3%), H-2->L+13 (2%), H-1->L+12 (7%), HOMO->L+14 (5%) |
| 82 | 163.4                | 0.0099              | H-14->LUMO (17%), H-13->L+1 (15%), H-2->L+11 (43%)                                | H-12->LUMO (2%), H-2->L+13 (4%), H-1->L+12 (3%), HOMO->L+14 (2%)                                                                            |
| 89 | 160.8                | 0.014               | H-4->L+5 (15%), H-3->L+9 (10%), H-3->L+10 (21%), HOMO->L+16 (19%)                 | H-14->L+2 (3%), H-5->L+3 (3%), H-4->L+6 (4%), H-3->L+12 (4%), H-1->L+12 (7%), HOMO->L+18 (2%)                                               |
| 90 | 160.7                | 0.0161              | H-5->L+5 (19%), H-4->L+4 (38%), H-2->L+12 (11%)                                   | H-5->L+6 (3%), H-4->L+3 (8%), H-4->L+8 (8%), HOMO->L+17 (3%)                                                                                |
| 91 | 160.6                | 0.0184              | H-4->L+5 (37%), H-2->L+13 (13%), HOMO->L+16 (13%)                                 | H-14->L+2 (6%), H-5->L+3 (5%), H-5->L+4 (3%), H-4->L+6 (3%), H-3->L+9 (3%), H-1->L+12 (3%)                                                  |
| 95 | 158.1                | 0.0741              | H-14->L+2 (13%), H-5->L+4 (16%), H-3->L+9 (13%), H-2->L+14 (23%), H-1->L+15 (12%) | H-5->L+3 (3%), H-5->L+8 (3%), H-3->L+10 (6%)                                                                                                |
| 96 | 157.5                | 0.0069              | H-3->L+11 (14%), H-2->L+12 (10%), H-1->L+14 (10%), HOMO->L+17 (36%)               | H-5->L+5 (3%), H-3->L+13 (8%), H-3->L+14 (5%)                                                                                               |
| 97 | 157.4                | 0.0109              | H-5->L+4 (35%), H-2->L+14 (16%), H-1->L+15 (10%)                                  | H-14->L+2 (8%), H-4->L+5 (7%), H-3->L+9 (2%), H-3->L+12 (2%), HOMO->L+16 (3%)                                                               |

**Table S17.** Wavelength ( $\lambda$ , nm) and oscillator strength of the mono-electronic transitions of  $[(\text{CH}_3)_2\text{CHOC}(\text{S})\text{S}]_2$  calculated with the TD-B3LYP/6-31+g (d) approximation

| N° | $\lambda(\text{nm})$ | Oscillator Strength | Major contribution                                                  | Minor contribution                                                                        |
|----|----------------------|---------------------|---------------------------------------------------------------------|-------------------------------------------------------------------------------------------|
| 5  | 283.5                | 0.0231              | H-2->LUMO (12%), H-2->L+2 (18%), H-1->L+1 (45%), HOMO->LUMO (18%)   | HOMO->L+2 (3%)                                                                            |
| 9  | 268.0                | 0.0569              | H-3->L+1 (52%), H-2->LUMO (11%), H-2->L+2 (17%)                     | HOMO->LUMO (8%), HOMO->L+2 (7%)                                                           |
| 11 | 247.1                | 0.6605              | H-3->L+1 (31%), H-2->LUMO (15%), HOMO->L+2 (16%)                    | H-5->L+1 (3%), H-4->LUMO (4%), H-2->L+2 (5%), H-1->L+1 (6%)                               |
| 12 | 234.6                | 0.061               | H-3->LUMO (21%), H-3->L+2 (25%), H-2->L+1 (11%), H-1->L+2 (10%)     | H-5->LUMO (3%), H-4->L+1 (7%), H-1->L+6 (2%), HOMO->L+5 (2%)                              |
| 13 | 221.3                | 0.011               | HOMO->L+3 (88%)                                                     | H-4->L+1 (4%)                                                                             |
| 16 | 217.5                | 0.0183              | H-5->L+1 (29%), H-4->LUMO (39%), H-4->L+2 (27%)                     |                                                                                           |
| 18 | 213.4                | 0.0172              | H-5->L+1 (14%), H-1->L+3 (64%)                                      | H-4->LUMO (2%), H-1->L+5 (3%), HOMO->L+4 (7%), HOMO->L+7 (3%)                             |
| 19 | 210.9                | 0.0345              | H-5->LUMO (40%), H-4->L+1 (28%)                                     | H-3->LUMO (2%), HOMO->L+3 (6%)                                                            |
| 20 | 208.7                | 0.1228              | H-5->L+1 (37%), H-4->LUMO (19%), H-1->L+3 (21%)                     | H-3->L+3 (2%)                                                                             |
| 22 | 206.0                | 0.06                | HOMO->L+4 (35%), HOMO->L+6 (47%)                                    | H-3->L+3 (2%), H-1->L+3 (5%)                                                              |
| 24 | 200.7                | 0.0515              | H-1->L+5 (55%), HOMO->L+4 (10%)                                     | H-3->L+3 (4%), H-2->L+4 (2%), H-2->L+6 (4%), H-1->L+3 (2%), H-1->L+8 (4%), HOMO->L+6 (6%) |
| 25 | 199.6                | 0.0094              | H-1->L+5 (14%), HOMO->L+4 (35%), HOMO->L+6 (36%)                    | H-2->L+6 (4%), H-1->L+3 (3%)                                                              |
| 26 | 198.5                | 0.0091              | H-2->L+3 (16%), H-2->L+5 (18%), H-1->L+4 (12%), H-1->L+6 (36%)      | H-6->LUMO (3%), H-2->L+8 (3%), H-2->L+9 (2%)                                              |
| 27 | 196.3                | 0.0157              | H-3->L+3 (63%), HOMO->L+7 (14%)                                     | H-1->L+5 (3%), HOMO->L+4 (9%)                                                             |
| 29 | 193.9                | 0.0097              | H-2->L+5 (13%), H-1->L+4 (54%), HOMO->L+8 (21%)                     | HOMO->L+10 (3%)                                                                           |
| 32 | 192.2                | 0.0242              | H-3->L+3 (15%), HOMO->L+7 (73%)                                     |                                                                                           |
| 33 | 190.5                | 0.0131              | H-2->L+4 (15%), H-2->L+6 (36%), H-1->L+5 (13%)                      | H-7->LUMO (3%), H-6->L+1 (3%), H-3->L+3 (4%), H-3->L+5 (5%), H-1->L+8 (5%), H-1->L+9 (3%) |
| 35 | 187.9                | 0.0151              | H-1->L+7 (41%), HOMO->L+10 (35%)                                    | H-3->L+4 (4%), H-1->L+4 (8%)                                                              |
| 37 | 186.7                | 0.0289              | H-3->L+5 (22%), H-2->L+4 (46%), H-1->L+8 (13%)                      | H-1->L+10 (3%), HOMO->L+11 (5%)                                                           |
| 38 | 184.7                | 0.0499              | H-3->L+5 (24%), H-1->L+8 (41%), H-1->L+9 (14%)                      | HOMO->L+6 (3%), HOMO->L+12 (5%)                                                           |
| 42 | 183.2                | 0.0159              | H-2->L+4 (11%), H-1->L+10 (10%), HOMO->L+11 (33%), HOMO->L+12 (20%) | H-2->L+6 (7%), H-1->L+8 (6%)                                                              |
| 48 | 178.8                | 0.0201              | H-8->L+1 (10%), H-7->L+1 (37%), H-6->LUMO (24%), H-6->L+2 (12%)     | H-3->L+4 (4%), H-3->L+6 (4%)                                                              |
| 49 | 178.6                | 0.0328              | H-2->L+7 (29%), H-1->L+9 (22%), HOMO->L+12 (28%)                    | H-2->L+4 (3%), HOMO->L+11 (7%)                                                            |
| 50 | 177.7                | 0.0139              | H-6->L+2 (66%), H-2->L+8 (10%)                                      | H-3->L+4 (4%), H-3->L+6 (7%), H-2->L+9 (3%)                                               |
| 51 | 176.77               | 0.0506              | H-1->L+10 (29%), HOMO->L+12 (12%), HOMO->L+14 (25%)                 | H-3->L+8 (6%), H-3->L+9 (4%), H-2->L+7 (2%),                                              |

continuation of the Table S17

| N° | $\lambda(\text{nm})$ | Oscillator Strength | Major contribution                                                  | Minor contribution                                                                                                                   |
|----|----------------------|---------------------|---------------------------------------------------------------------|--------------------------------------------------------------------------------------------------------------------------------------|
|    |                      |                     |                                                                     | H-2->L+12 (3%), HOMO->L+11 (3%)                                                                                                      |
| 53 | 176.27               | 0.0149              | H-1->L+11 (42%), HOMO->L+13 (14%)                                   | H-3->L+4 (8%), H-2->L+9 (2%), H-2->L+10 (6%),<br>H-1->L+12 (8%), HOMO->L+10 (8%)                                                     |
| 55 | 174.0                | 0.0165              | H-3->L+7 (39%), H-1->L+11 (25%)                                     | H-4->L+3 (3%), H-3->L+4 (2%), H-2->L+10 (7%),<br>H-1->L+12 (9%), HOMO->L+13 (3%), HOMO->L+15 (2%)                                    |
| 60 | 172.8                | 0.0145              | H-3->L+8 (41%), HOMO->L+14 (21%)                                    | H-7->L+2 (2%), H-3->L+5 (3%), H-3->L+9 (3%),<br>H-1->L+9 (3%), H-1->L+10 (3%), H-1->L+13 (2%),<br>HOMO->L+12 (4%), HOMO->L+18 (5%)   |
| 61 | 172.5                | 0.0106              | H-8->L+1 (17%), HOMO->L+15 (38%)                                    | H-6->LUMO (3%), H-3->L+7 (4%), H-2->L+9 (4%),<br>H-2->L+10 (2%), H-1->L+12 (3%), H-1->L+14 (4%),<br>HOMO->L+13 (8%), HOMO->L+17 (4%) |
| 70 | 167.0                | 0.0338              | H-3->L+10 (17%), H-2->L+12 (25%), H-1->L+13 (17%), H-1->L+15 (23%)  | H-3->L+9 (2%), HOMO->L+18 (3%)                                                                                                       |
| 71 | 166.9                | 0.0128              | H-2->L+11 (11%), H-2->L+12 (28%), H-1->L+15 (10%), HOMO->L+16 (23%) | H-3->L+8 (2%), H-2->L+14 (3%), H-1->L+13 (4%),<br>HOMO->L+14 (4%), HOMO->L+18 (4%)                                                   |
| 73 | 166.6                | 0.021               | H-3->L+9 (34%), HOMO->L+16 (20%), HOMO->L+18 (19%)                  | H-3->L+8 (5%), H-1->L+13 (7%), HOMO->L+14 (3%)                                                                                       |
| 77 | 164.5                | 0.0181              | H-8->L+2 (11%), H-5->L+5 (10%), H-3->L+10 (24%), H-1->L+15 (20%)    | H-5->L+3 (3%), H-2->L+12 (5%), HOMO->L+18 (9%)                                                                                       |
| 83 | 163.1                | 0.0643              | H-8->L+2 (32%), H-5->L+5 (11%), H-4->L+6 (11%), H-3->L+10 (15%)     | H-4->L+4 (4%), H-2->L+12 (3%), H-2->L+14 (2%)                                                                                        |
| 87 | 161.7                | 0.035               | H-11->LUMO (24%), H-9->L+1 (39%)                                    | H-12->LUMO (4%), H-5->L+5 (4%), H-4->L+4 (3%),<br>H-2->L+14 (4%), H-1->L+17 (6%)                                                     |
| 94 | 159.4                | 0.0199              | H-11->L+2 (12%), H-8->L+2 (20%), H-5->L+5 (12%), H-4->L+4 (30%)     | H-12->L+2 (3%), H-11->LUMO (3%), H-9->L+1 (2%),<br>H-4->L+6 (3%), H-2->L+14 (4%), H-2->L+16 (3%)                                     |

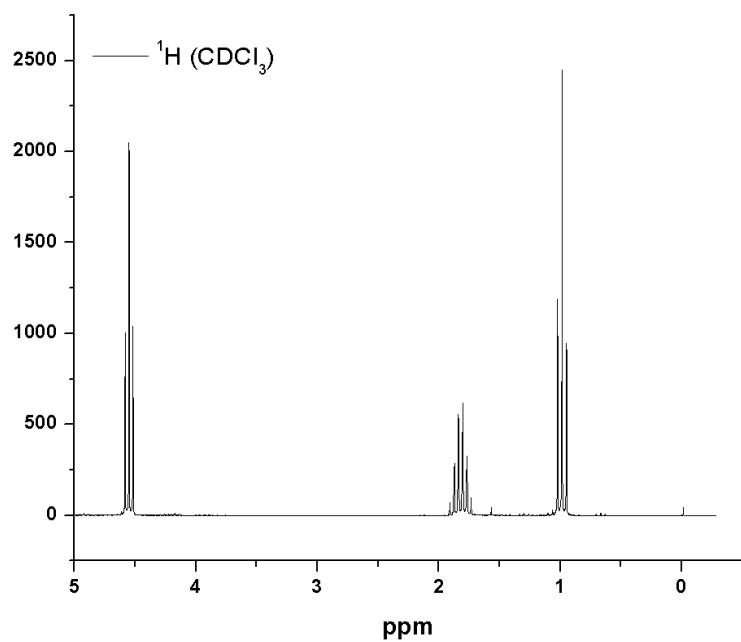

**Figure S1.**  $^1\text{H}$  NMR spectra of  $[\text{CH}_3(\text{CH}_2)_2\text{OC}(\text{S})\text{S}]_2$  in  $\text{CDCl}_3$ .

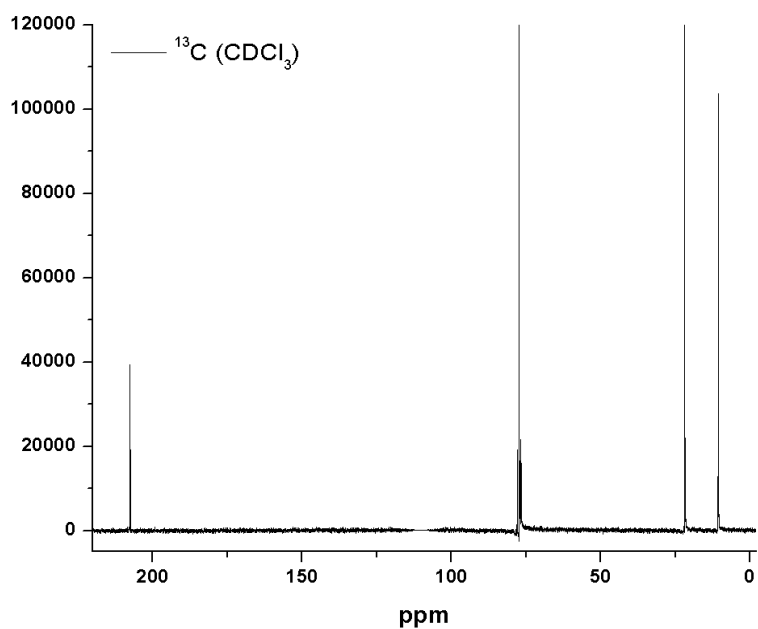

**Figure S2.**  $^{13}\text{C}$  NMR spectra of  $[\text{CH}_3(\text{CH}_2)_2\text{OC}(\text{S})\text{S}]_2$  in  $\text{CDCl}_3$ .

(b)



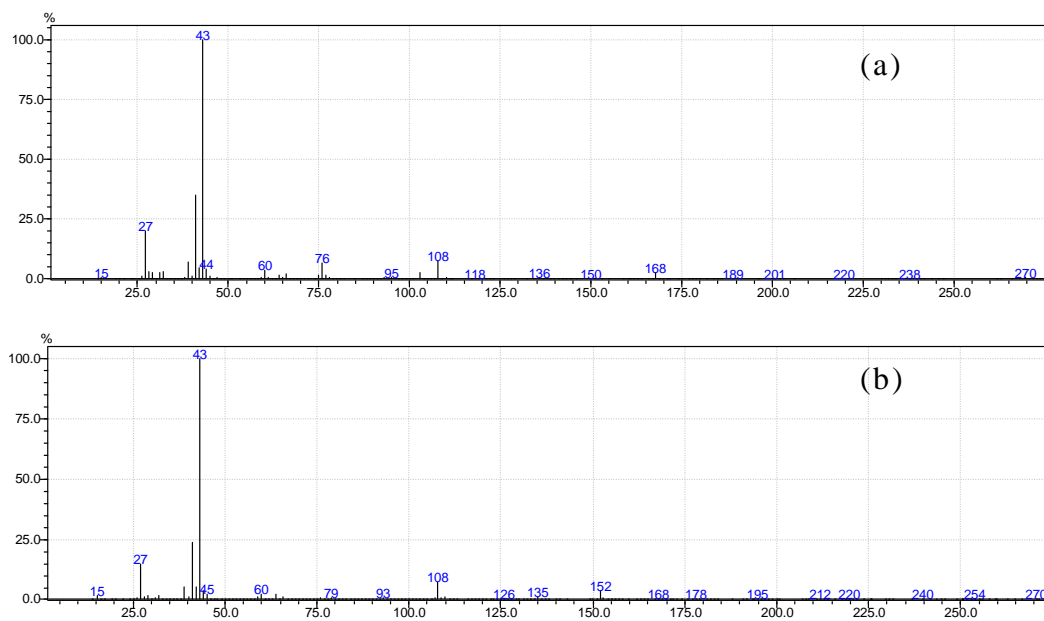

**Figure S3.** Mass spectra of  $[\text{CH}_3(\text{CH}_2)_2\text{OC}(\text{S})\text{S}]_2$  (a) and  $[(\text{CH}_3)_2\text{CHOC}(\text{S})\text{S}]_2$  (b), on electron impact ionization (70 eV, ion source temperature = 200 °C).

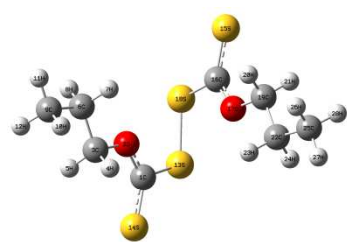

I (AAAGAAA)

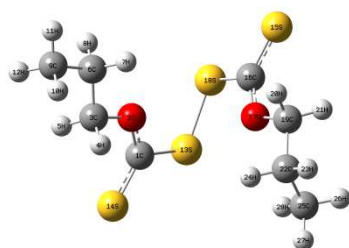

II (AAAGAAG<sup>+</sup>)

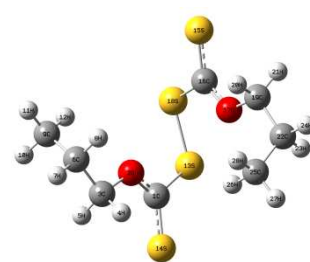

III (G<sup>+</sup>AAGAAG<sup>-</sup>)

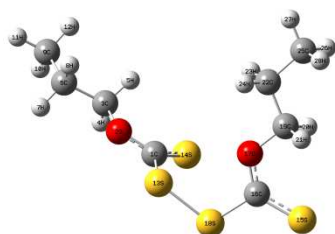

IV (AASGAAA)

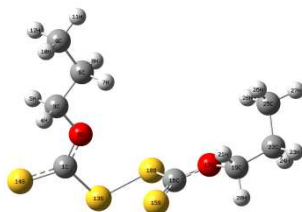

V (AASGAAG<sup>+</sup>)

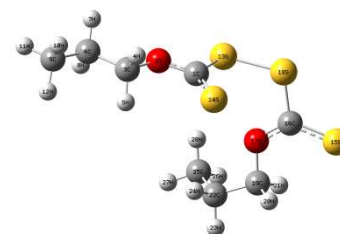

VI (AAAGSAG<sup>+</sup>)

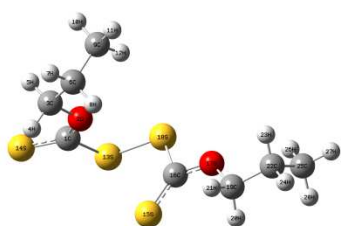

VII (G<sup>+</sup>AAGSAG<sup>-</sup>)

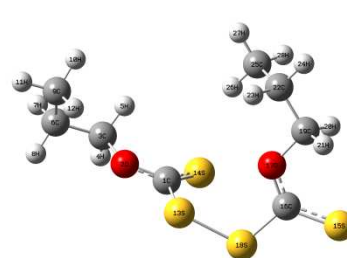

VIII (G<sup>+</sup>ASGAAG<sup>-</sup>)

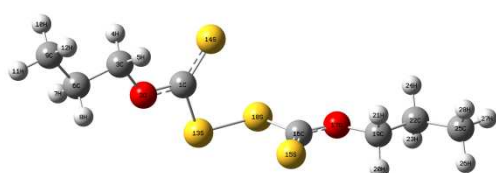

IX (AASGSAA)

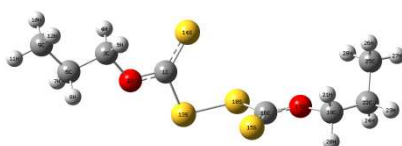

X (AASGSAG<sup>+</sup>)

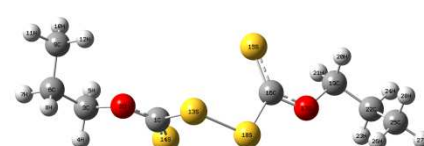

XI (G<sup>+</sup>ASGSAG<sup>-</sup>)

**Figure S4.** Molecular models of the most stable conformers of  $[\text{CH}_3(\text{CH}_2)_2\text{OC}(\text{S})\text{S}]_2$  calculated with the B3LYP/6-31+G\* approximation.

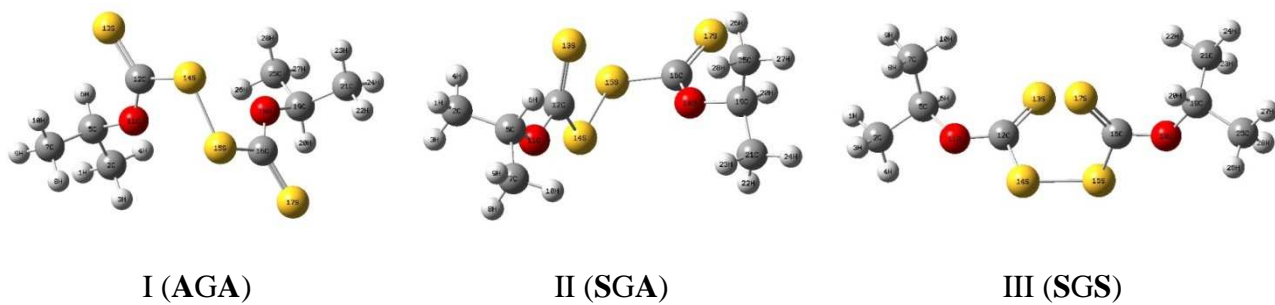

**Figure S5.** Molecular models of the most stable conformers of  $[(\text{CH}_3)_2\text{CHOC}(\text{S})\text{S}]_2$  calculated with the B3LYP/6-31+G\* approximation.

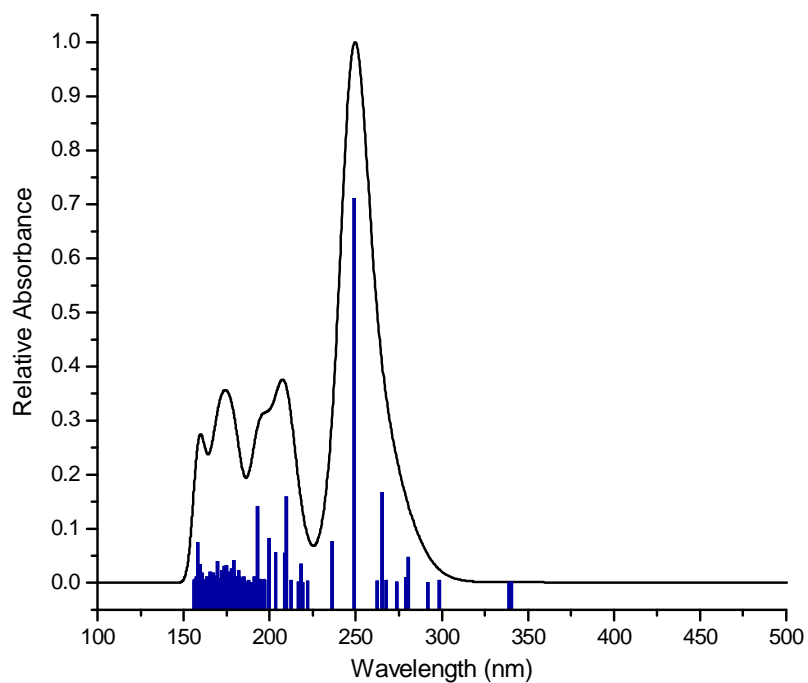

**Figure S6.** Absorption spectra (full trace) and oscillator strength of the electronic transitions (blue bars) of  $[\text{CH}_3(\text{CH}_2)_2\text{OC}(\text{S})\text{S}]_2$  calculated with the TD-B3LYP/6-31+G\* approximation.

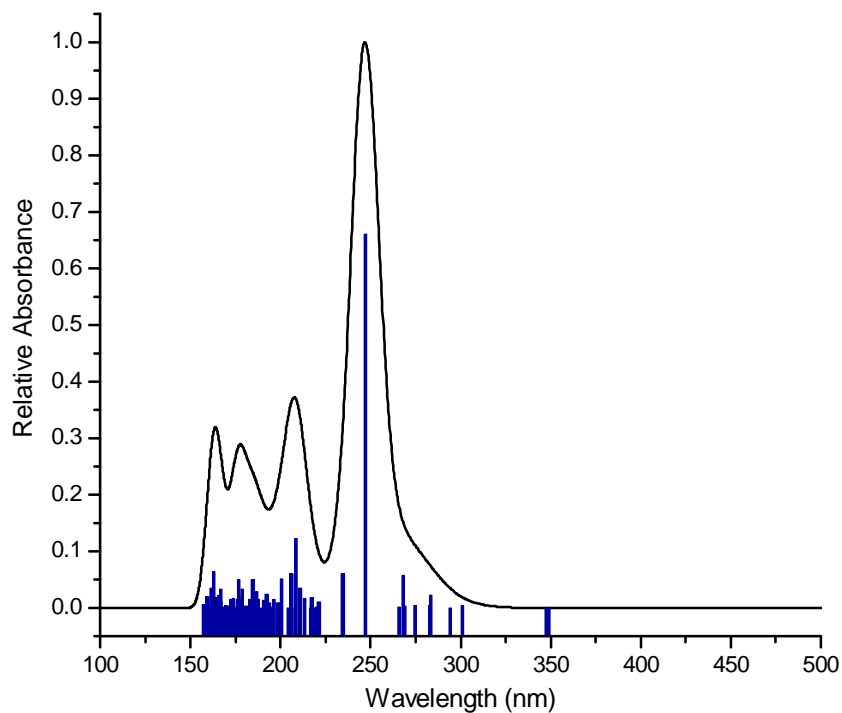

**Figure S7.** Absorption spectra (full trace) and oscillator strength of the electronic transitions (blue bars) of  $[(\text{CH}_3)_2\text{CHOC}(\text{S})\text{S}]_2$  calculated with the TD-B3LYP/6-31+G\* approximation.
